# Supplementary material for: Fingerprinting of Proteases, Protease Inhibitors and Indigenous Peptides in Human Milk
Source: MDPI journal article supplement (doi:10.3390/nu15194169), 2023-09-27
Supplement: s1 [file s1]

Supplementary table 1. : Provides additional data about mothers 1 to 6 in study.

| ID | Age | Parity | Birth   | Gestational age (w+d) |
|----|-----|--------|---------|-----------------------|
| 1  | 35  | 1      | Vaginal | 41+1                  |
| 2  | 32  | 2      | Vaginal | 40+0                  |
| 3  | 31  | 1      | Vaginal | 41+3                  |
| 4  | 32  | 1      | Vaginal | 38+6                  |
| 5  | 31  | 0      | Vaginal | 40+2                  |
| 6  | 35  | 2      | Vaginal | 39+5                  |
